# Supplementary material for: Combined PARP and Dual Topoisomerase Inhibition Potentiates Genome Instability and Cell Death in Ovarian Cancer
Source: MDPI journal article supplement (doi:10.3390/ijms231810503), 2022-09-10
Supplement: s1 [file s1]

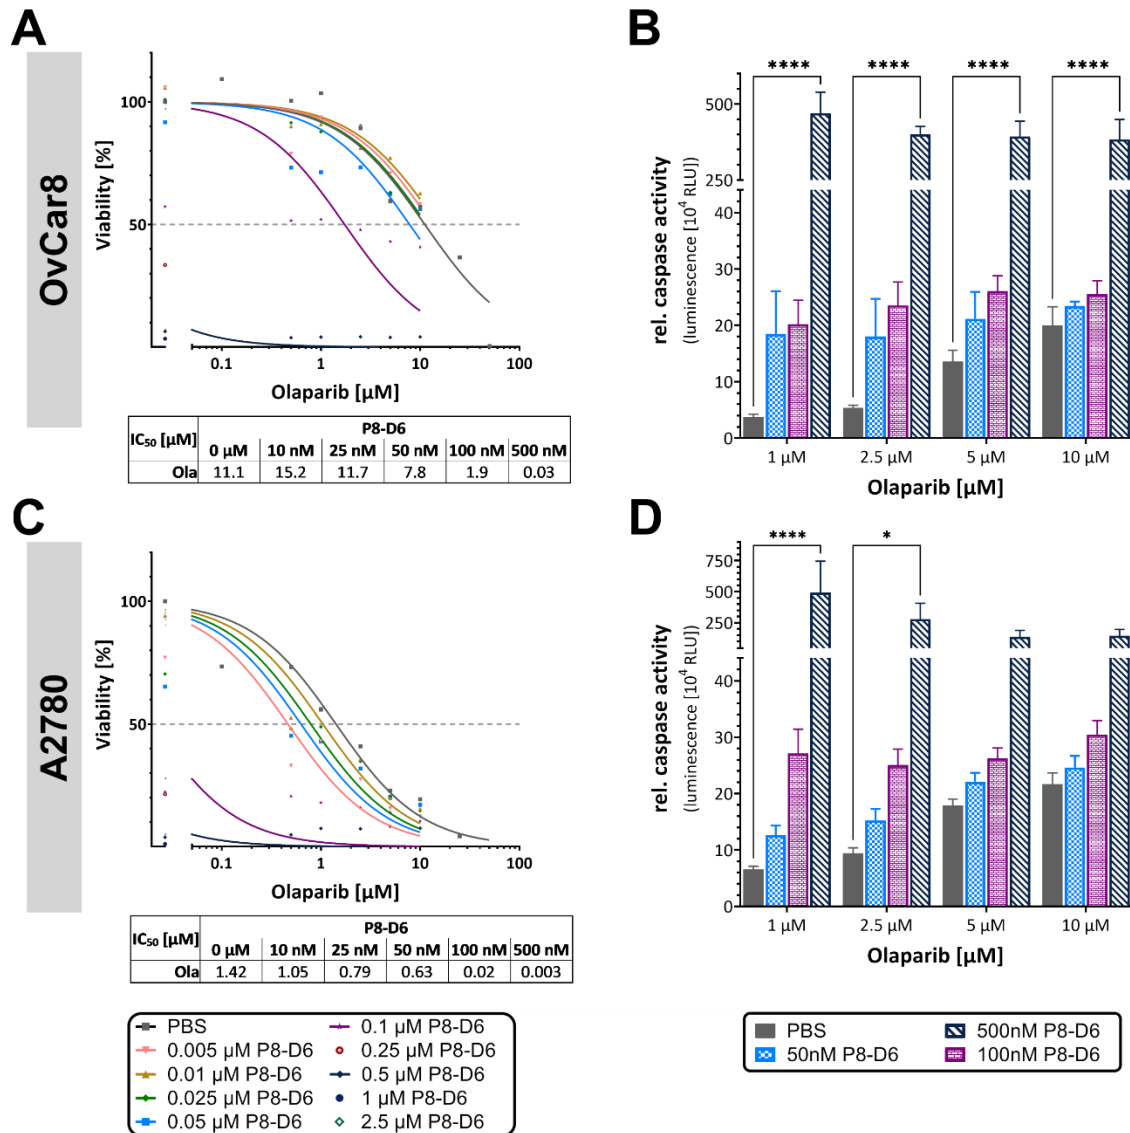

**Figure S1. Antitumor benefit by adding P8-D6 to olaparib treatment in OC 2D culture.** OvCar8 and A2780 cells were treated in 2D monolayer cell culture with different concentrations of olaparib and P8-D6 in single and combination therapy. Subsequently, the viability and caspase activity were determined. (A, C) The IC<sub>50</sub> value of each P8-D6 concentration was calculated by using the viability data. (B, D) The apoptosis is represented as relative caspase activity. Data are means + SEM one-way ANOVA, \* ( $p < 0.05$ ), \*\* ( $p < 0.01$ ), \*\*\* ( $p < 0.001$ ), \*\*\*\* ( $p < 0.0001$ ).

**A**

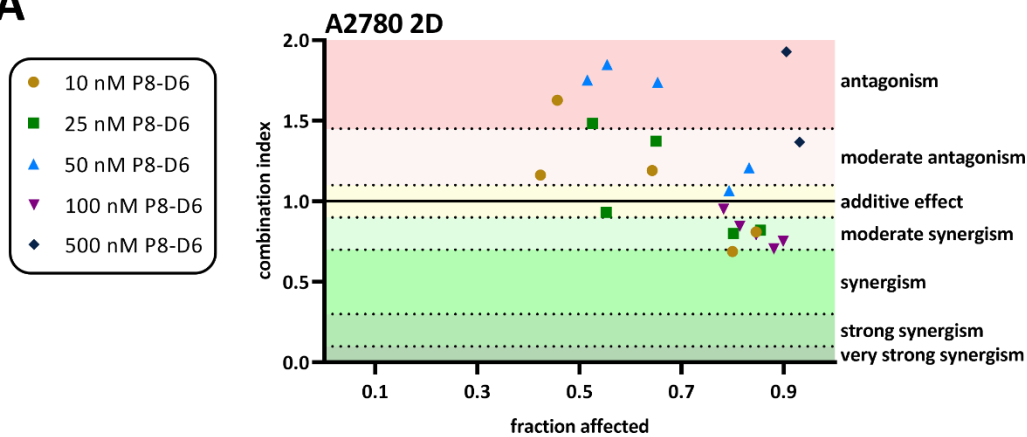

**B**

| Combination therapy<br>P8-D6 /Olaparib[ $\mu$ M] |          | fa    | Monotherapy [ $\mu$ M] |          | Dose-Reduction index |          |
|--------------------------------------------------|----------|-------|------------------------|----------|----------------------|----------|
| P8-D6                                            | Olaparib |       | P8-D6                  | Olaparib | P8-D6                | Olaparib |
| 0.005                                            | 0.5      | 0.463 | 0.03                   | 0.79     | 6.4                  | 1.58     |
| 0.01                                             | 0.5      | 0.424 | 0.03                   | 0.62     | 2.78                 | 1.25     |
| 0.025                                            | 0.5      | 0.552 | 0.04                   | 1.37     | 1.76                 | 2.75     |
| 0.05                                             | 0.5      | 0.515 | 0.04                   | 1.09     | 0.77                 | 2.19     |
| 0.1                                              | 0.5      | 0.782 | 0.11                   | 7        | 1.14                 | 13.99    |
| 0.5                                              | 0.5      | 0.931 | 0.37                   | 52.67    | 0.74                 | 105.34   |
| 0.005                                            | 1        | 0.512 | 0.04                   | 1.07     | 7.62                 | 1.07     |
| 0.01                                             | 1        | 0.457 | 0.03                   | 0.76     | 3.14                 | 0.76     |
| 0.025                                            | 1        | 0.526 | 0.04                   | 1.17     | 1.6                  | 1.17     |
| 0.05                                             | 1        | 0.554 | 0.04                   | 1.39     | 0.89                 | 1.39     |
| 0.1                                              | 1        | 0.814 | 0.14                   | 9.42     | 1.35                 | 9.42     |
| 0.5                                              | 1        | 0.898 | 0.25                   | 27.48    | 0.5                  | 27.48    |
| 0.005                                            | 2.5      | 0.666 | 0.07                   | 2.85     | 13.49                | 1.14     |
| 0.01                                             | 2.5      | 0.643 | 0.06                   | 2.43     | 6.15                 | 0.97     |
| 0.025                                            | 2.5      | 0.650 | 0.06                   | 2.56     | 2.53                 | 1.02     |
| 0.05                                             | 2.5      | 0.653 | 0.06                   | 2.61     | 1.28                 | 1.04     |
| 0.1                                              | 2.5      | 0.846 | 0.17                   | 13.35    | 1.66                 | 5.34     |
| 0.5                                              | 2.5      | 0.905 | 0.27                   | 31.02    | 0.54                 | 12.41    |
| 0.005                                            | 5        | 0.833 | 0.15                   | 11.47    | 30.34                | 2.29     |
| 0.01                                             | 5        | 0.800 | 0.12                   | 8.21     | 12.49                | 1.64     |
| 0.025                                            | 5        | 0.801 | 0.13                   | 8.32     | 5.03                 | 1.66     |
| 0.05                                             | 5        | 0.793 | 0.12                   | 7.69     | 2.4                  | 1.54     |
| 0.1                                              | 5        | 0.881 | 0.22                   | 20.89    | 2.15                 | 4.18     |
| 0.5                                              | 5        | 0.902 | 0.26                   | 29.16    | 0.52                 | 5.83     |
| 0.005                                            | 10       | 0.877 | 0.21                   | 19.83    | 41.73                | 1.98     |
| 0.01                                             | 10       | 0.846 | 0.17                   | 13.35    | 16.57                | 1.34     |
| 0.025                                            | 10       | 0.854 | 0.18                   | 14.75    | 7.02                 | 1.47     |
| 0.05                                             | 10       | 0.832 | 0.15                   | 11.41    | 3.02                 | 1.14     |
| 0.1                                              | 10       | 0.899 | 0.25                   | 27.87    | 2.54                 | 2.79     |
| 0.5                                              | 10       | 0.911 | 0.29                   | 34.45    | 0.58                 | 3.45     |

|                           |
|---------------------------|
| DRI >10                   |
| DRI >5     Dose reduction |
| DRI >1                    |
| DRI < 1     Dose increase |

**Figure S2. Combination index (CI) analysis of olaparib in combination with P8-D6 in A2780 cells.** (A) Combination index (CI) for drug combinations by olaparib and P8-D6 in A2780 cells. CI values computed according by CompuSyn software with viability values. Combinations were considered synergistic when CIs were below 1.0. The fraction affected (fa)-value represents the fraction of cell viability affected by therapy. (B) The monotherapy column defines the concentrations that are needed in monotherapy to affect a certain fraction of cells by therapy. DRI values represents the order of magnitude (fold) of dose reduction in combination setting compared with each drug alone.

**A**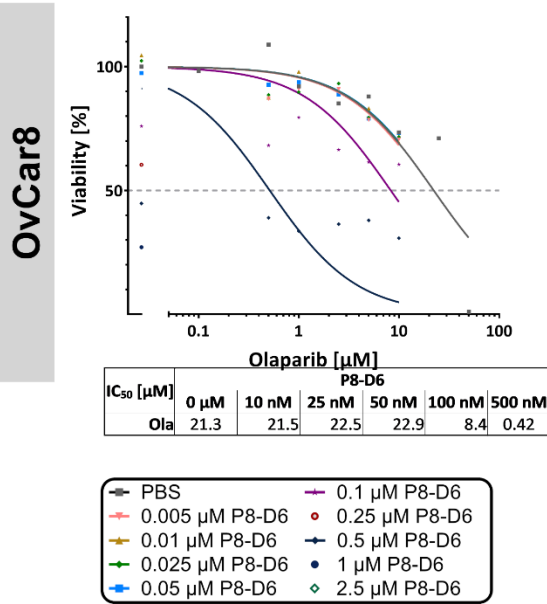**B**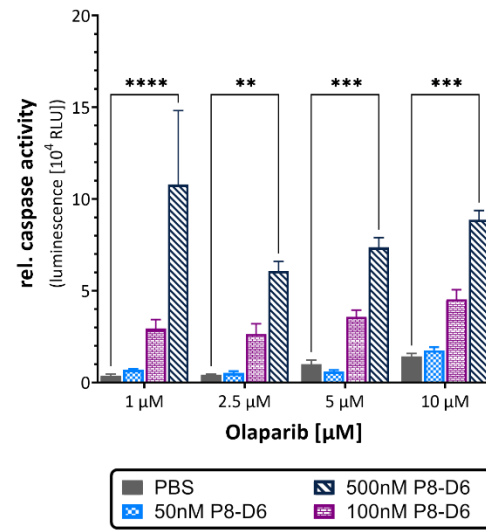

**Figure S3. Antitumor benefit by adding P8-D6 to olaparib treatment in OC 3D culture.** OvCar8 and A2780 cells were treated in 2D monolayer cell culture with different concentrations of olaparib and P8-D6 in single and combination therapy. Subsequently, the viability and caspase activity were determined. (A, C) The IC<sub>50</sub> value of each P8-D6 concentration was calculated by using the viability data. (B, D) The apoptosis is represented as relative caspase activity. Data are means + SEM one-way ANOVA, \* (p < 0.05), \*\* (p < 0.01), \*\*\* (p < 0.001), \*\*\*\* (p < 0.0001).

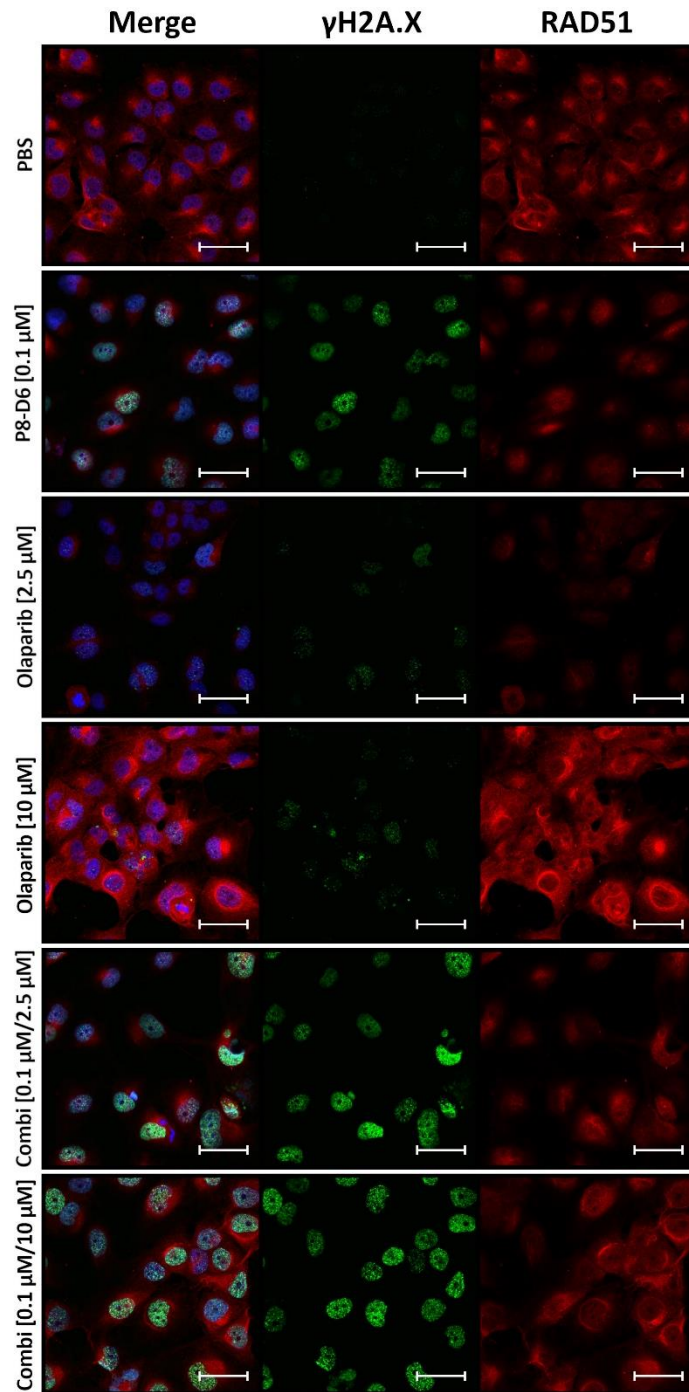

**Figure S4. Olaparib potentiates  $\gamma$ H2A.X and RAD51 recruitment for strand break induced by P8-D6 in OvCar8.** Immunofluorescence images of OvCar8 2D monolayer: DAPI-stained nuclei (blue),  $\gamma$ H2A.X (green), and RAD51 (red) after treatment with olaparib and/or P8-D6; scale bars, 50  $\mu$ m.

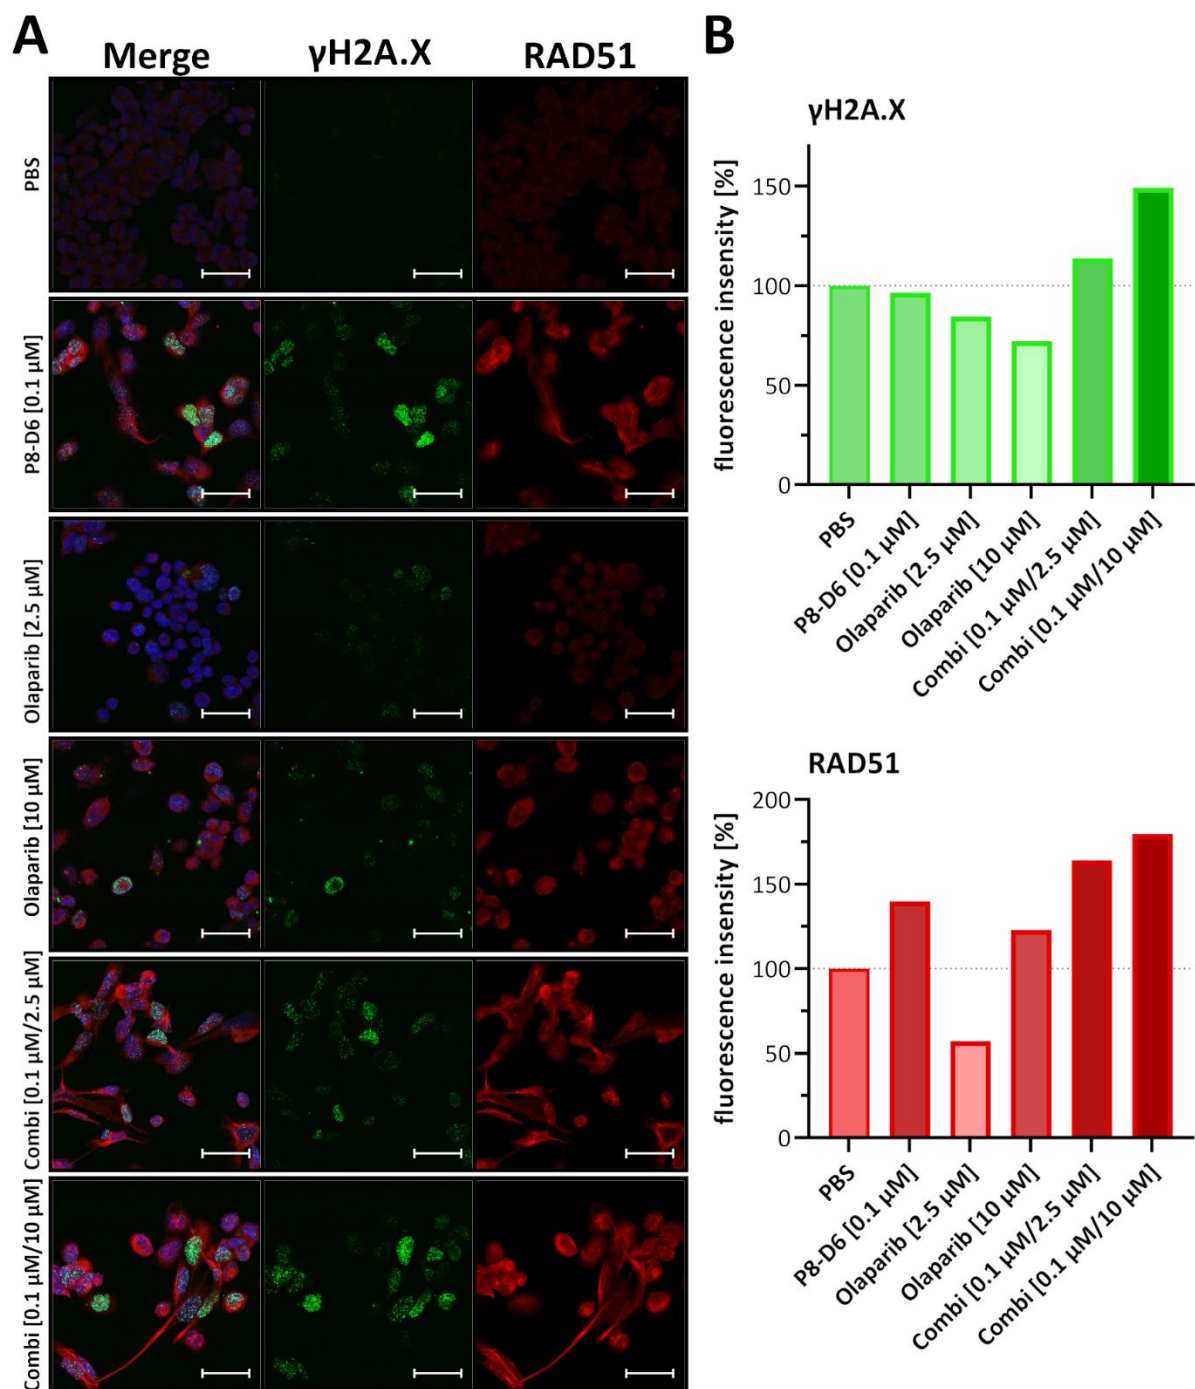

**Figure S5. Olaparib potentiates  $\gamma$ H2A.X and RAD51 recruitment for strand break induced by P8-D6 in A2780.** (A) Immunofluorescence images of A2780 2D monolayer: DAPI-stained nuclei (blue),  $\gamma$ H2A.X (green), and RAD51 (red) after treatment with olaparib and/or P8-D6; scale bars, 50  $\mu$ m. (B) The intensity of the  $\gamma$ H2A.X and RAD51 signal in relation to DAPI in A2780 2D monolayer after treatment.

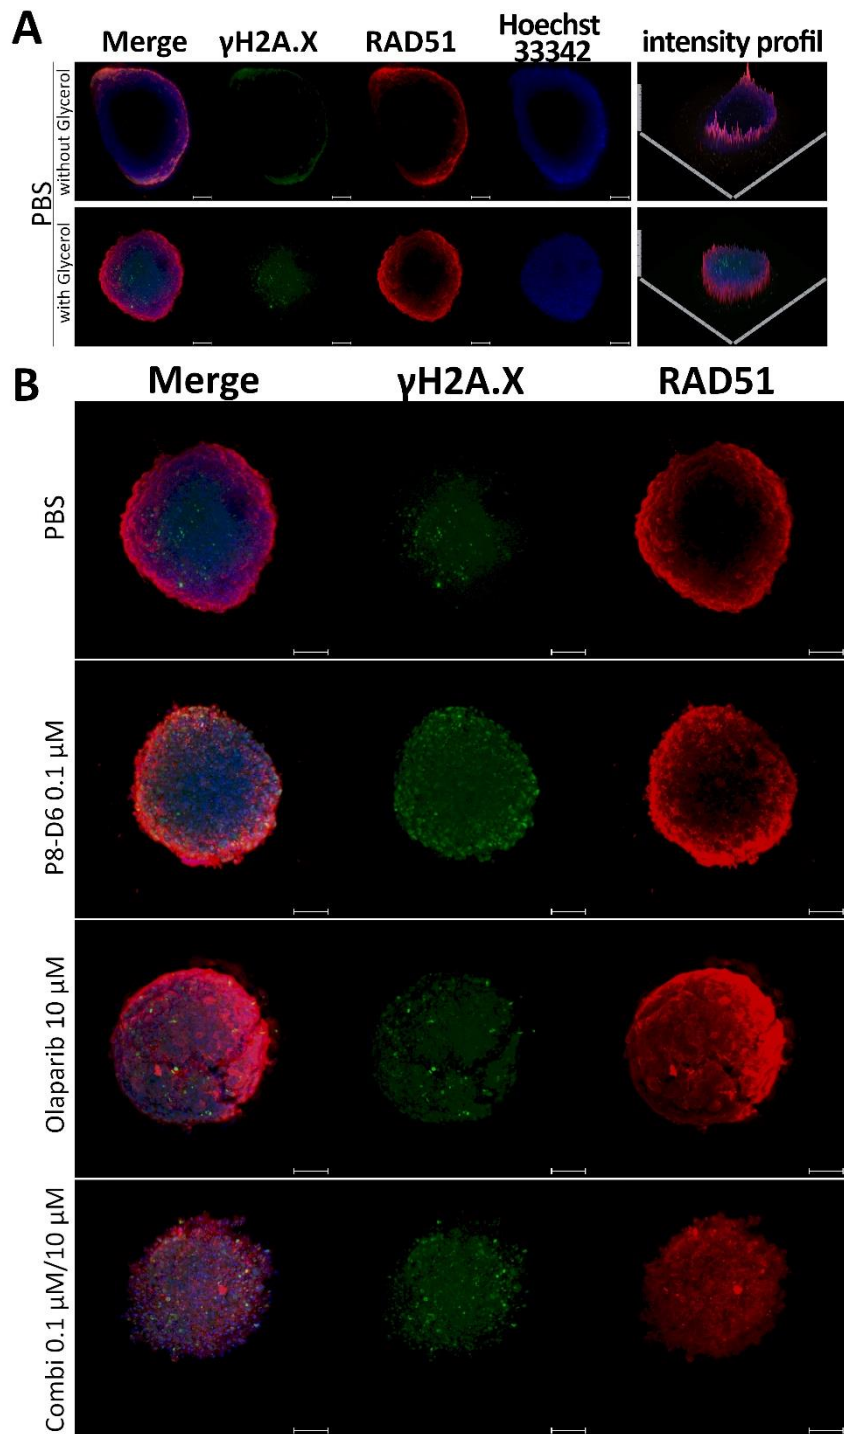

**Figure S6. Optical transparency and induction of DNA-strand break in spheroids.** (A) Optical transparency and detection of fluorescence signal intensity is depending on optical clearing protocol. Immunofluorescence images of OvCar8 spheroids treated with PBS and cleared with or without glycerol: Hoechst 33342-stained nuclei (blue),  $\gamma$ H2A.X (green), and RAD51 (red). Intensity profil shows transparency potential of the spheroids; scale bars, 100  $\mu$ m. (B) Confocal fluorescence z-stack images of OvCar8 spheroids were obtained with immunostaining against  $\gamma$ H2A.X, RAD51 and Hoechst 33342. Spheroids were previously treated with olaparib and/or P8-D6 following antibodies staining with glycerol; scale bars, 100  $\mu$ m
